# Supplementary material
Source: PubMed Central journal article supplement (PMC3368821)
Supplement: epi-7-390-s01.pdf [file epi-7-390-s01.pdf]

**Supplemental Material to:**

Yang P-M, Lin P-J, Chen C-C

*CD1d induction in solid tumor cells by histone deacetylase inhibitors through inhibition of HDAC1/2 and activation of Sp1*

Epigenetics 2012; 7(4); <http://dx.doi.org/10.4161/epi.7.4.19373>

<http://www.landesbioscience.com/journals/epigenetics/article/19373/>

Included: Figures S1 and S2, Table S1

## **Legends to supplementary figures**

**Suppl. Fig. S1. TSA-induced CD1d mRNA expression was not affected by various inhibitors in A549 and TC-1 cells.** A549 and TC-1 cells were pretreated with Ro318220 (1  $\mu$ M), Y27632 (30  $\mu$ M), KN-62 (5  $\mu$ M), SB203580 (30  $\mu$ M), PD98059 (30  $\mu$ M), SP600125 (25  $\mu$ M), LY294002 (30  $\mu$ M), rapamycin (100 ng/ml), SH-5 (20  $\mu$ M), or wortmannin (0.3  $\mu$ M) for 1 hour, then treated with TSA (1  $\mu$ M) overnight. Total RNA (2  $\mu$ g) were used for RT-PCR.

**Suppl. Fig. S2. Effects of apicidin alone or combination with MS-275 on CD1d mRNA expression in A549 cells.** A549 cells were treated with 0.5, 1, or 2  $\mu$ M apicidin in the presence or absence of 1  $\mu$ M MS-275 for 24 h. Total RNA (2  $\mu$ g) were used for RT-PCR.

A549

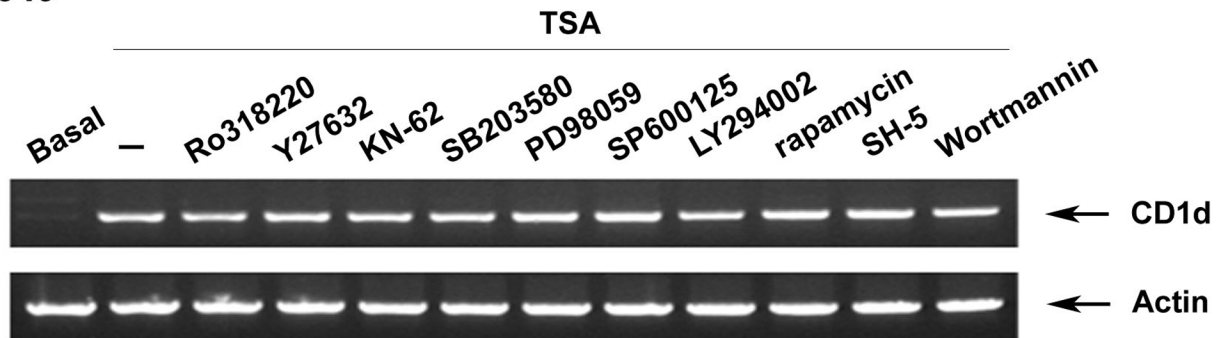

TC-1

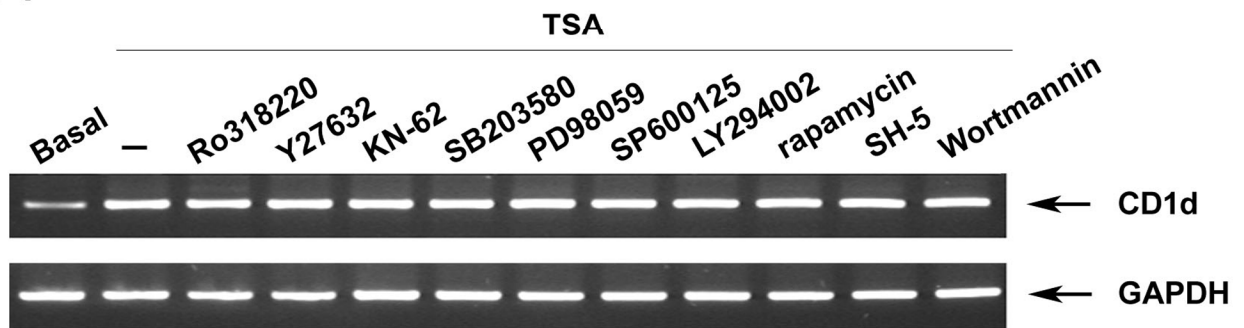

suppl. Fig. S1

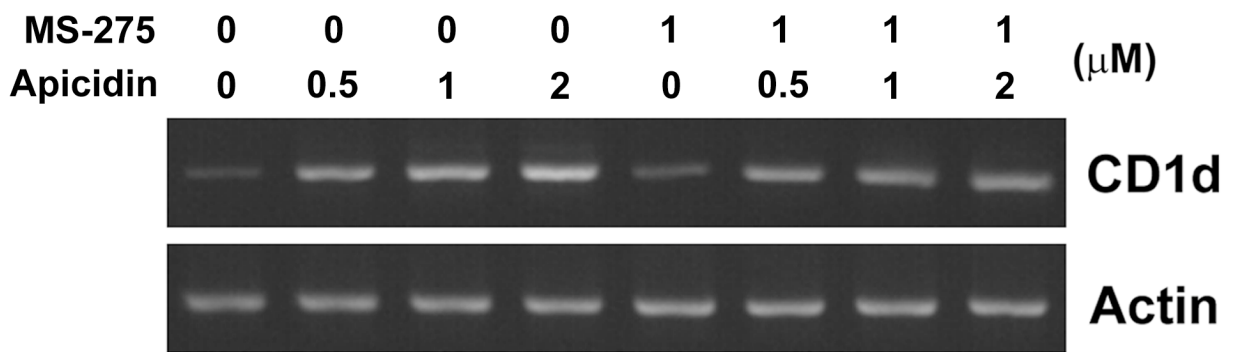

**suppl. Fig. S2**

**Suppl. Table S1.** Comparison of the IC<sub>50</sub> values of HDAC inhibitors reported in the literatures.

| Compound | HDAC inhibition | IC <sub>50</sub> (nM) reported in the literates |        |        |        |            |        | Ranges of IC <sub>50</sub> (nM) |
|----------|-----------------|-------------------------------------------------|--------|--------|--------|------------|--------|---------------------------------|
|          |                 | Ref. 1                                          | Ref. 2 | Ref. 3 | Ref. 4 | Ref. 5     | Ref. 6 |                                 |
| TSA      | HDAC1           | 100                                             | 1      | 1.5    |        | 2          |        | 1-2;<br>100                     |
|          | HDAC2           |                                                 |        |        |        | 3          |        | 3                               |
|          | HDAC3           | 300                                             |        | 0.6    |        | 4          |        | 0.6-4;<br>300                   |
| SAHA     | HDAC1           |                                                 | 148    | 119    | 21     | 68         | 100    | 21-148                          |
|          | HDAC2           |                                                 |        |        |        | 164        | 440    | 164-440                         |
|          | HDAC3           |                                                 | 119    | 106    | 37     | 48         | 20     | 20-119                          |
| MS-275   | HDAC1           | 300                                             | 5990   | 185    | 180    | 181        | 13000  | 180-300;<br>>5990               |
|          | HDAC2           |                                                 |        |        |        | 1155       | 510    | 510-1155                        |
|          | HDAC3           | 8000                                            |        | 201    | 740    | 2311       | 70     | 70-740;<br>>2311                |
| Apicidin | HDAC1           |                                                 |        | 2      |        | >1000<br>0 | <10    | <10;<br>>10000                  |
|          | HDAC2           |                                                 |        |        |        | 120        | 33.7   | 33.7-120                        |
|          | HDAC3           |                                                 |        | 0.7    |        | 43         | <10    | 0.7-43                          |

#### References

- Hu E, Dul E, Sung CM, Chen Z, Kirkpatrick R, Zhang GF, et al. Identification of novel isoform-selective inhibitors within class I histone deacetylases. *J Pharmacol Exp Ther* 2003; 307:720-8.
- Li J, Staver MJ, Curtin ML, Holms JH, Frey RR, Edalji R, et al. Expression and functional characterization of recombinant human HDAC1 and HDAC3. *Life Sci* 2004; 74:2693-705.
- Vannini A, Volpari C, Filocamo G, Casavola EC, Brunetti M, Renzoni D, et al. Crystal structure of a eukaryotic zinc-dependent histone deacetylase, human HDAC8, complexed with a hydroxamic acid inhibitor. *Proc Natl Acad Sci U S A* 2004; 101:15064-9.
- Beckers T, Burkhardt C, Wieland H, Gimmnich P, Ciossek T, Maier T, et al. Distinct pharmacological properties of second generation HDAC inhibitors with the benzamide or hydroxamate head group. *Int J Cancer* 2007; 121:1138-48.
- Khan N, Jeffers M, Kumar S, Hackett C, Boldog F, Khramtsov N, et al. Determination of the class and isoform selectivity of small-molecule histone deacetylase inhibitors. *Biochem J* 2008; 409:581-9.
- Blackwell L, Norris J, Suto CM, Janzen WP. The use of diversity profiling to characterize chemical modulators of the histone deacetylases. *Life Sci* 2008; 82:1050-8.
